# Supplementary material for: Epigenetic Locking of Vascular and Inflammatory Effectors Defines the Universal Host Response to Severe Infection
Source: Research Square preprint supplement (doi:10.21203/rs.3.rs-8572339/v1), 2026-01-13
Supplement: Supplementary file 1 [file b92308f2d44d8ba57d7480b1.docx]

Supplementary Information

**Epigenetic Locking of Vascular and Inflammatory Effectors
Siddalingaiah H S, MD**

# Supplementary Methods

## 1. Data Acquisition and Quality Control

Raw fastq files were downloaded from GEO and processed using Cell Ranger ARC v2.0 (10x Genomics). Reference genome: GRCh38. Alignment parameters: default. Quality metrics tracked: Total UMI count, gene count, ATAC fragment count, TSS enrichment, nucleosome signal. Cells failing any of the following were excluded: genes < 200, genes > 5000, %MT > 15%, ATAC fragments < 1000, TSS enrichment < 4.

## 2. Doublet Removal

DoubletFinder v2.0.3 was used with pK optimization. Expected doublet rate: 4% for 10x datasets. Homotypic doublet proportion estimated per cluster. Doublets removed prior to integration.

## 3. Integration and Batch Correction

Integration used Harmony (v1.0) with theta=2 and max.iter=20. UMAP: 30 neighbors, min.dist=0.3, metric=cosine. Clustering: Louvain algorithm, resolution=0.8.

## 4. Peak Calling and Gene Activity

ATAC peaks called using MACS2 via Signac. Peak-gene links established using LinkPeaks with +/- 500kb window. Gene activity scores calculated by summing ATAC fragments in promoter regions (+/- 2kb TSS).

# Supplementary Tables

## Supplementary Table 1. Dataset Characteristics

**Table S1. Summary of Single-Cell Datasets**

| **Dataset** | **GEO ID** | **Cells (QC-pass)** | **Tissue** | **Conditions** |
| --- | --- | --- | --- | --- |
| TB (BAL) | GSE167232 | 5,412 | BAL | Active TB vs. Control |
| TB (PBMC) | GSE287288 | 4,945 | PBMC | Active TB vs. Control |
| Sepsis | GSE151263 | 24,796 | PBMC | Sepsis vs. Healthy |
| Dengue | GSE154386 | 20,000 | PBMC | Acute vs. Baseline |

## Supplementary Table 2. Complete Core Signature (Top 50)

**Table S2. Top 50 Core Primed Genes (Full List in GitHub)**

| **Rank** | **Gene Symbol** |
| --- | --- |
| 1 | TYMP |
| 2 | HLA-DRB5 |
| 3 | MYL12A |
| 4 | AIF1 |
| 5 | S100A9 |
| 6 | ARPC3 |
| 7 | PRDX1 |
| 8 | UBB |
| 9 | CD52 |
| 10 | S100A10 |
| 11 | RPS26 |
| 12 | LGALS3 |
| 13 | CD63 |
| 14 | S100A11 |
| 15 | VIM |
| 16 | TSPO |
| 17 | TMSB4X |
| 18 | CYBA |
| 19 | HLA-C |
| 20 | CALM2 |
| 21 | B2M |
| 22 | S100A4 |
| 23 | NDUFB8 |
| 24 | UBL5 |
| 25 | BLOC1S1 |
| 26 | ALDH2 |
| 27 | RPS27 |
| 28 | RETN |
| 29 | GAPDH |
| 30 | NDUFV2 |
| 31 | HLA-A |
| 32 | TYROBP |
| 33 | CTSD |
| 34 | NDUFC2 |
| 35 | RPL13 |
| 36 | HLA-DRA |
| 37 | RAC2 |
| 38 | ANXA1 |
| 39 | RPL26 |
| 40 | PSMB3 |
| 41 | PSMA5 |
| 42 | H3F3A |
| 43 | UQCR10 |
| 44 | PFN1 |
| 45 | PYCARD |
| 46 | ARPC2 |
| 47 | LGALS1 |
| 48 | NDUFA12 |
| 49 | RPS15A |
| 50 | ANXA5 |

# Supplementary Figures


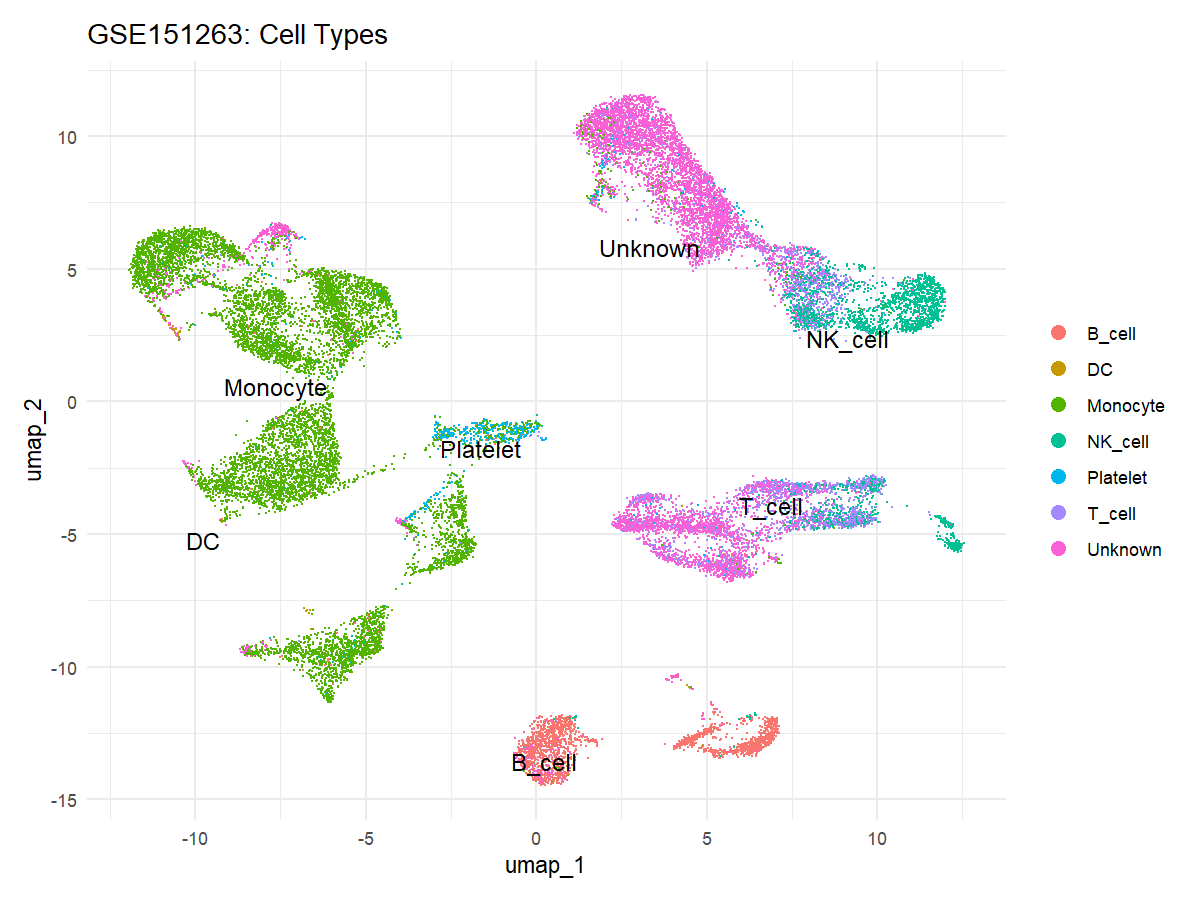


*Figure S1. UMAP of Sepsis dataset colored by cell type annotation.*


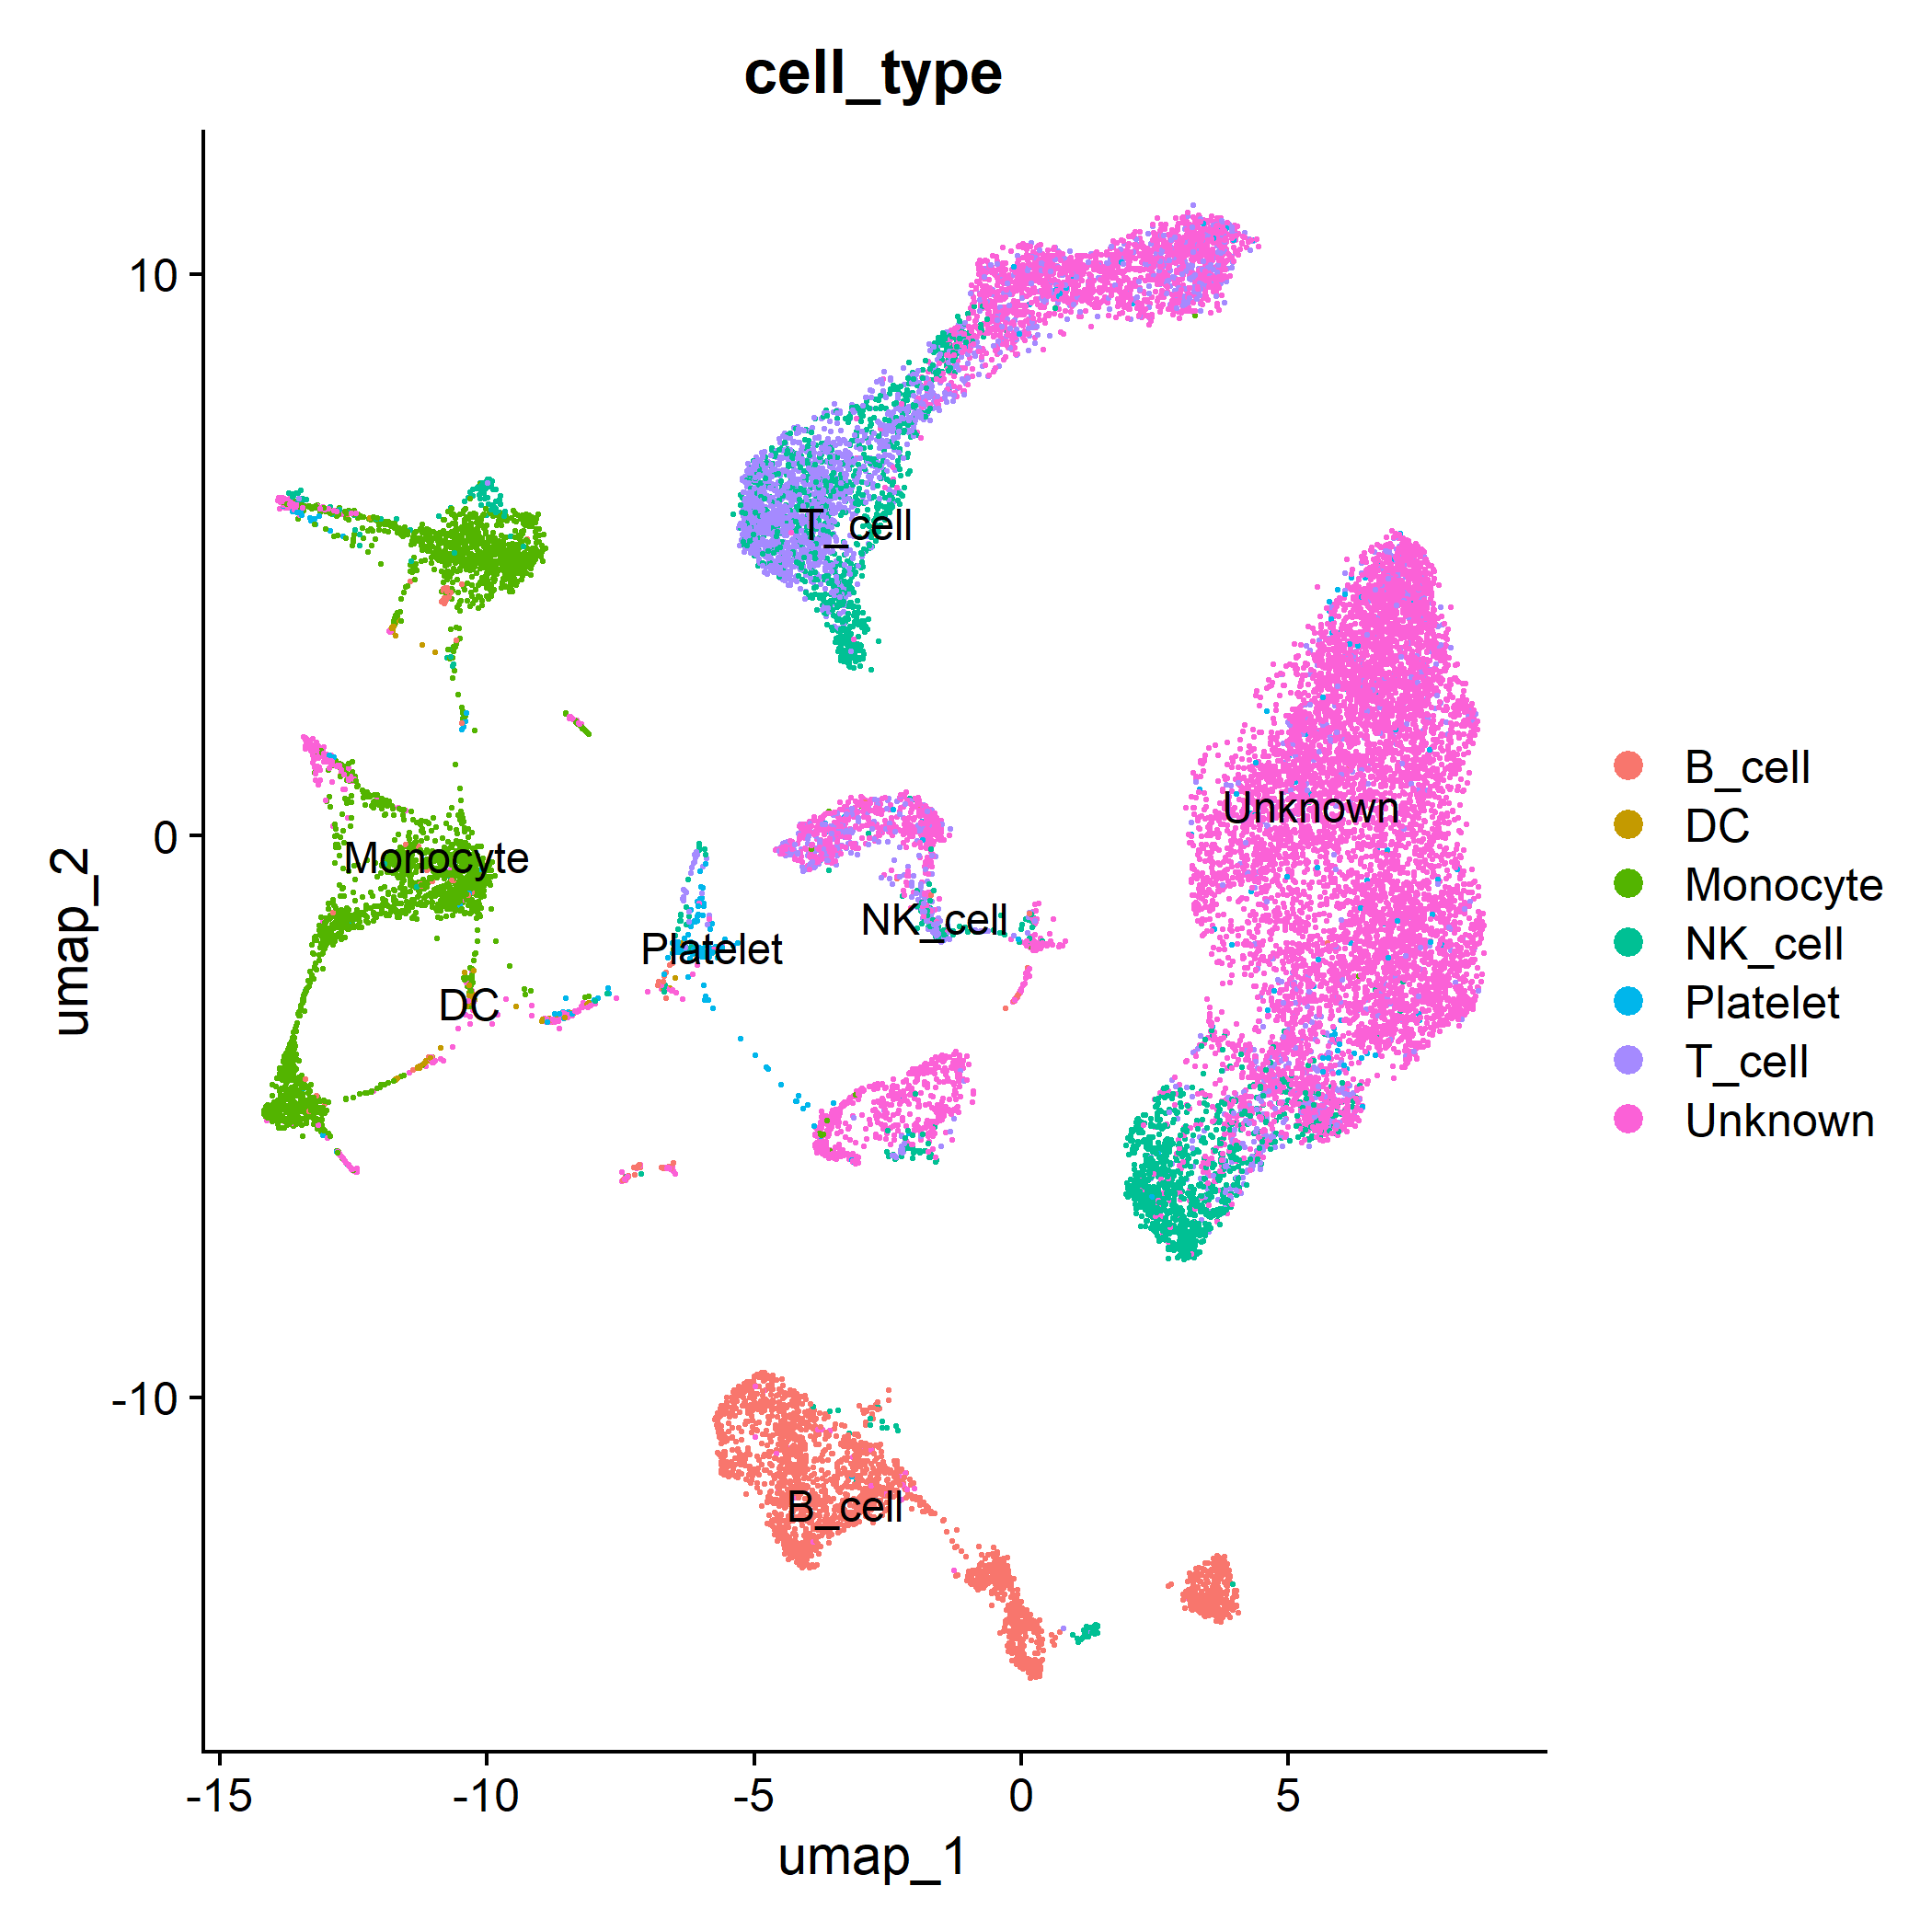


*Figure S2. UMAP of Dengue dataset colored by cell type annotation.*


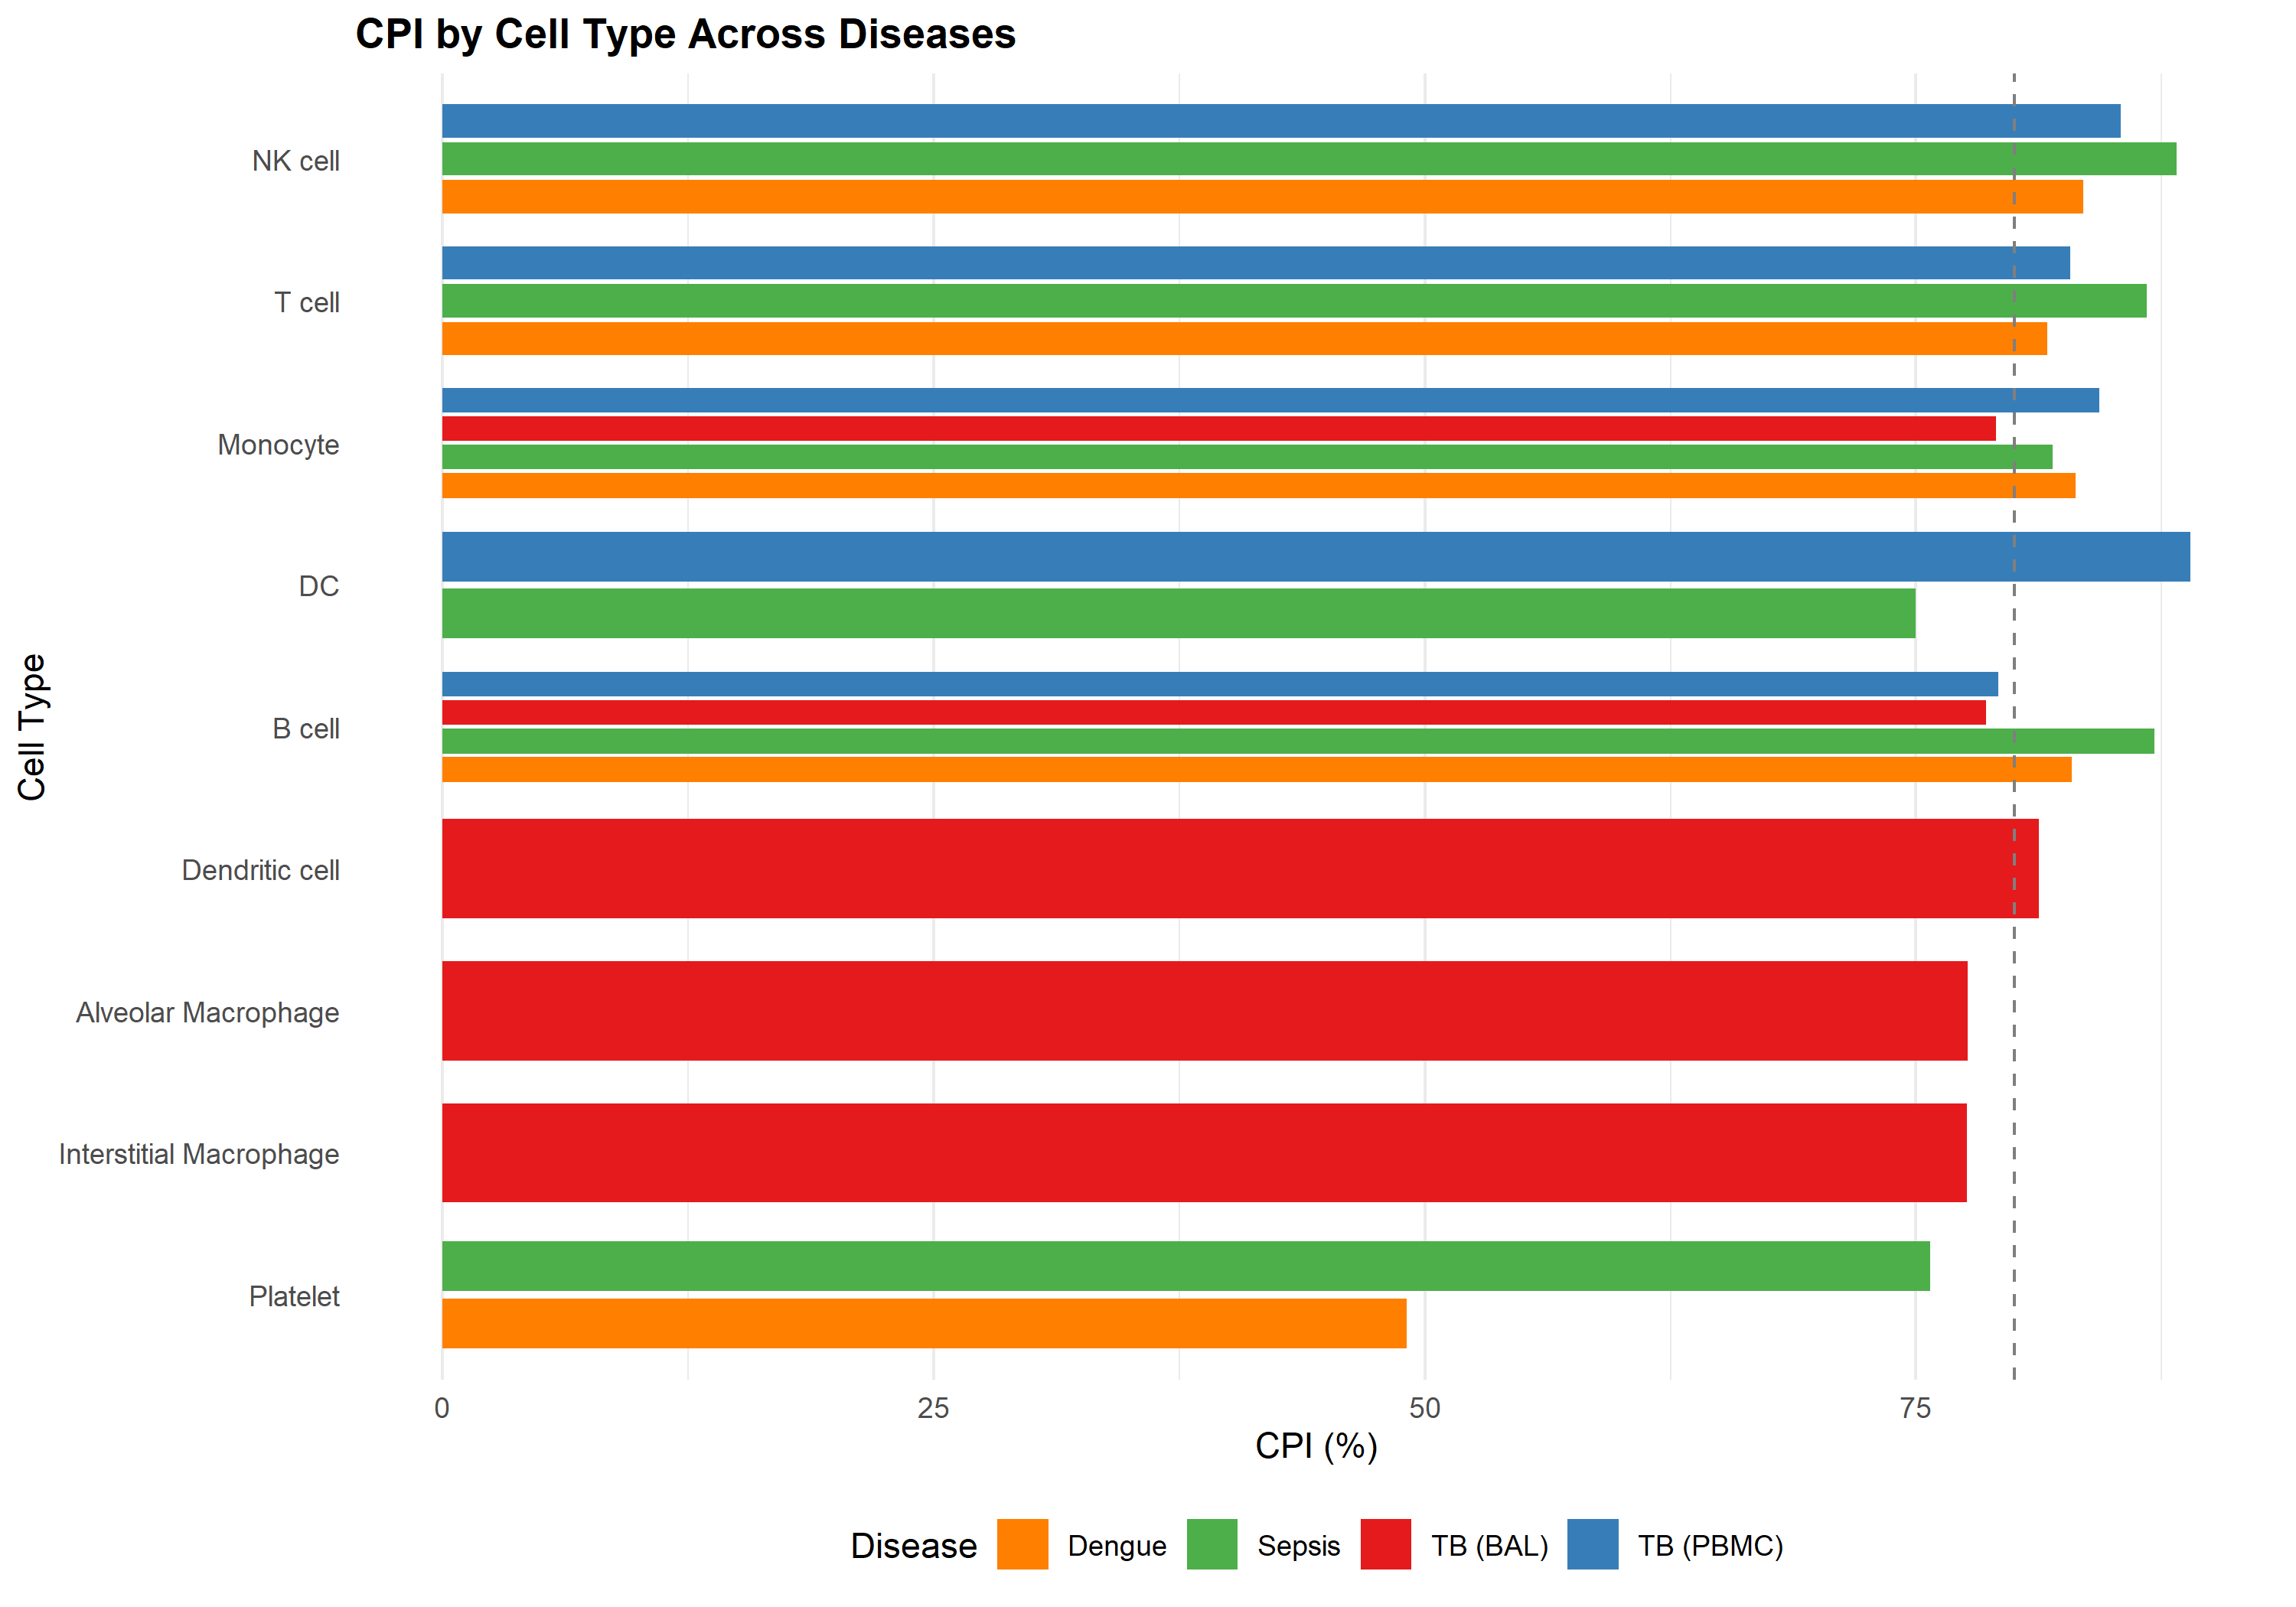


*Figure S3. CPI by Cell Type and Disease. Bar chart showing CPI stratified by immune subset.*
